# Supplementary material
Source: publisher site journal article supplement (https://www.dovepress.com/article/573217)
Supplement: Supplementary file 1 [file 573217%20Revised%20Supplementary%20Materials.docx]

|  | Algorithm |
| --- | --- |
| Nonalcoholic fatty liver disease fibrosis score (NFS) |  |
| Fibrosis-4 index (FIB-4) |  |

**Supplementary Table 1. Algorithms for NAFLD fibrosis score and FIB-4.**

**NFS: Nonalcoholic fatty liver disease fibrosis score, FIB-4: Fibrosis-4 index**

| qPCR Primers | Sequence (5’→3’) |
| --- | --- |
| GAPDH-F | GGAGCGAGATCCCTCCAAAAT |
| GAPDH-R | GGCTGTTGTCATACTTCTCATGG |
| CD11B-F | GGAACGCCATTGTCTGCTTTCG |
| CD11B-R | ATGCTGAGGTCATCCTGGCAGA |
| CD68-F | CGAGCATCATTCTTTCACCAGCT |
| CD68-R | ATGAGAGGCAGCAAGATGGACC |
| IL-6-F | AGACAGCCACTCACCTCTTCAG |
| IL-6-R | TTCTGCCAGTGCCTCTTTGCTG |
| IL-1B-F | CCACAGACCTTCCAGGAGAATG |
| IL-1B-R | GTGCAGTTCAGTGATCGTACAGG |
| TNF-α-F | CTCTTCTGCCTGCTGCACTTTG |
| TNF-α-R | ATGGGCTACAGGCTTGTCACTC |
| IL-10-F | TCTCCGAGATGCCTTCAGCAGA |
| IL-10-R | TCAGACAAGGCTTGGCAACCCA |
| α-SMA-F | AAAAGACAGCTACGTGGGTGA |
| α-SMA-R | GCCATGTTCTATCGGGTACTTC |

**Supplementary Table 2. The primers for qPCR.**

**Supplementary Table 3. Subgroup analysis of metabolic, endocrine and inflammatory parameters of male patients, raw and propensity score-matched data**

|  | **Raw data** | | |  | **Propensity score-matched data** | | | |
| --- | --- | --- | --- | --- | --- | --- | --- | --- |
|  | Weight regain | Weight sustain | P |  | Weight regain | Weight sustain | P | SMD |
| n | 67 | 35 |  |  | 31 | 31 |  |  |
| Age (years) | 27.33 (6.03) | 29.49 (6.09) | 0.091 |  | 29.65 (6.60) | 29.23 (6.06) | 0.795 | 0.066 |
| Height (m) | 1.79 (0.06) | 1.76 (0.06) | 0.063 |  | 1.78 (0.06) | 1.77 (0.06) | 0.391 |  |
| Weight (kg) | 125.83 (17.26) | 116.40 (19.89) | 0.015 |  | 118.50 (13.97) | 119.16 (19.43) | 0.879 | 0.039 |
| BMI (kg/m^2) | 39.46 (4.92) | 37.39 (5.72) | 0.058 |  | 37.38 (4.29) | 38.05 (5.74) | 0.604 | 0.132 |
| HbA1c (%) | 5.45 [5.30, 5.82] | 5.60 [5.30, 5.85] | 0.675 |  | 5.55 [5.30, 6.35] | 5.60 [5.40, 5.85] | 0.903 |  |
| Fasting plasma glucose (mmol/L) | 5.44 [5.00, 5.96] | 5.35 [4.96, 5.81] | 0.639 |  | 5.74 [5.06, 6.65] | 5.29 [4.90, 5.81] | 0.092 |  |
| 2-h plasma glucose (mmol/L) | 7.69 [6.60, 8.84] | 6.97 [6.39, 9.42] | 0.561 |  | 7.78 [6.73, 9.53] | 6.97 [6.39, 9.14] | 0.291 |  |
| Fasting serum insulin (μIU/mL) | 27.54 [16.25, 36.32] | 21.75 [17.98, 26.45] | 0.160 |  | 28.84 [17.86, 35.54] | 21.62 [17.98, 26.45] | 0.110 |  |
| 2-h serum insulin (μIU/mL) | 134.65 [93.65, 234.85] | 113.90 [78.76, 168.00] | 0.080 |  | 131.45 [98.52, 198.88] | 110.70 [78.76, 161.60] | 0.187 |  |
| HOMA-IR | 6.06 [3.71, 9.80] | 5.33 [4.43, 6.93] | 0.414 |  | 6.08 [3.96, 10.17] | 5.22 [4.43, 6.93] | 0.181 |  |
| HOMA-β | 249.93 [181.09, 388.27] | 216.81 [169.62, 329.39] | 0.284 |  | 225.45 [171.74, 325.55] | 213.77 [169.62, 329.39] | 0.660 |  |
| ISI (0,120) | 8.61 [5.63, 12.45] | 8.93 [7.52, 12.35] | 0.288 |  | 8.57 [5.74, 11.83] | 8.93 [7.85, 12.35] | 0.162 |  |
| DI | 42.64 [30.87, 60.00] | 43.86 [33.33, 60.00] | 0.833 |  | 36.38 [20.29, 56.89] | 47.52 [33.53, 64.41] | 0.177 |  |
| Trygliceride (mmol/L) | 1.72 [1.23, 2.34] | 1.59 [1.21, 2.25] | 0.472 |  | 2.09 [1.29, 2.36] | 1.55 [1.21, 2.21] | 0.181 |  |
| Total cholesterol (mmol/L) | 5.16 (1.50) | 4.96 (0.91) | 0.481 |  | 5.33 (1.47) | 4.94 (0.95) | 0.217 |  |
| HDL-C (mmol/L) | 1.07 (0.33) | 1.00 (0.18) | 0.308 |  | 1.10 (0.43) | 0.99 (0.18) | 0.189 |  |
| LDL-C (mmol/L) | 3.30 (1.21) | 3.26 (0.77) | 0.860 |  | 3.38 (1.29) | 3.27 (0.80) | 0.709 |  |
| Free triiodothyronine (pmol/L) | 4.72 (0.49) | 4.64 (0.48) | 0.456 |  | 4.84 (0.50) | 4.63 (0.50) | 0.099 |  |
| Free tetraiodothyronine (pmol/L) | 12.82 [12.07, 13.84] | 13.54 [12.54, 14.35] | 0.096 |  | 12.69 [11.96, 13.76] | 13.95 [12.54, 14.35] | 0.072 |  |
| Thyroid stimulating hormone (μIU/mL) | 1.97 [1.39, 2.31] | 1.96 [1.63, 2.69] | 0.852 |  | 1.96 [1.42, 2.23] | 1.96 [1.63, 2.62] | 0.849 |  |
| WBC count (10^9/L) | 7.81 (2.15) | 7.47 (1.46) | 0.436 |  | 7.02 (2.12) | 7.58 (1.41) | 0.263 |  |
| Neutrophil percentage (%) | 57.56 (8.77) | 55.83 (6.62) | 0.337 |  | 57.38 (10.30) | 55.54 (6.96) | 0.450 |  |
| C-reactive protein (mg/L) | 3.40 [1.67, 7.16] | 2.60 [1.23, 4.77] | 0.228 |  | 3.66 [1.56, 6.46] | 2.60 [1.19, 4.87] | 0.575 |  |

Continuous variables with normal distribution are presented as mean (standard deviation), while other continuous variables are presented as median [interquartile range]. Categorical variables are presented as n (%).

Continuous variables with normal distribution are presented as mean (standard deviation), while other continuous variables are presented as median [interquartile range]. Categorical variables are presented as n (%).

SMD: standardized mean difference; SD: standard deviation; BMI: body mass index; HbA1c: glycosylated hemoglobin; HOMA-IR: Homeostasis Model Assessment of Insulin Resistance; HOMA-β: Homeostasis Model Assessment of β-cell Function; ISI (0,120): insulin sensitivity index derived from 0- and 120-min OGTT values; DI: disposition indices; HDL-C: high-density lipoprotein cholesterol; LDL-C: low-density lipoprotein cholesterol; WBC: white blood cell

**Supplementary Table 4. Subgroup analysis of metabolic, endocrine and inflammatory parameters of female patients, raw and propensity score-matched data**

|  | **Raw data** | | |  | **Propensity score-matched data** | | | |
| --- | --- | --- | --- | --- | --- | --- | --- | --- |
|  | Weight regain | Weight sustain | P |  | Weight regain | Weight sustain | P | SMD |
| n | 90 | 21 |  |  | 30 | 15 |  |  |
| Age (years) | 27.31 (5.06) | 30.38 (7.45) | 0.025 |  | 26.53 (4.34) | 26.60 (4.81) | 0.963 | 0.015 |
| Height (m) | 1.65 (0.06) | 1.64 (0.05) | 0.544 |  | 1.65 (0.07) | 1.65 (0.05) | 0.799 |  |
| Weight (kg) | 99.60 (15.00) | 96.46 (14.90) | 0.390 |  | 99.87 (13.55) | 100.78 (14.80) | 0.838 | 0.064 |
| BMI (kg/m^2) | 36.65 (4.94) | 35.84 (4.90) | 0.497 |  | 36.59 (4.16) | 37.15 (4.98) | 0.693 | 0.122 |
| HbA1c (%) | 5.60 [5.30, 5.90] | 5.50 [5.20, 6.00] | 0.656 |  | 5.60 [5.35, 5.95] | 5.40 [5.12, 5.77] | 0.348 |  |
| Fasting plasma glucose (mmol/L) | 5.40 [5.08, 6.00] | 5.79 [5.37, 6.18] | 0.078 |  | 5.39 [4.90, 5.85] | 5.46 [5.28, 6.06] | 0.202 |  |
| 2-h plasma glucose (mmol/L) | 7.91 [6.68, 10.46] | 9.14 [6.64, 10.55] | 0.752 |  | 7.92 [6.71, 9.47] | 7.70 [6.22, 10.16] | 0.810 |  |
| Fasting serum insulin (μIU/mL) | 21.66 [14.23, 30.47] | 23.19 [17.70, 32.88] | 0.517 |  | 22.52 [15.95, 31.97] | 23.19 [17.98, 30.47] | 0.700 |  |
| 2-h serum insulin (μIU/mL) | 148.12 [104.80, 198.30] | 139.60 [117.00, 206.30] | 0.772 |  | 156.40 [86.12, 215.68] | 139.60 [110.40, 233.55] | 0.866 |  |
| HOMA-IR | 5.40 [3.77, 7.72] | 5.80 [4.18, 9.13] | 0.438 |  | 5.59 [3.83, 7.68] | 5.80 [4.74, 7.69] | 0.665 |  |
| HOMA-β | 233.28 [146.04, 326.59] | 225.46 [169.18, 291.80] | 0.746 |  | 232.66 [168.49, 335.16] | 254.53 [190.19, 299.15] | 0.981 |  |
| ISI (0,120) | 9.17 [6.63, 12.11] | 8.58 [6.37, 10.56] | 0.489 |  | 8.92 [5.31, 12.52] | 8.58 [6.24, 11.06] | 0.791 |  |
| DI | 43.70 [30.00, 56.30] | 33.94 [27.17, 44.81] | 0.078 |  | 44.18 [32.90, 65.46] | 42.05 [28.65, 47.97] | 0.117 |  |
| Trygliceride (mmol/L) | 1.51 [1.14, 1.95] | 1.68 [1.31, 1.90] | 0.394 |  | 1.52 [1.09, 1.88] | 1.75 [1.48, 2.05] | 0.249 |  |
| Total cholesterol (mmol/L) | 4.85 (0.80) | 4.75 (0.66) | 0.615 |  | 4.92 (0.90) | 4.73 (0.70) | 0.484 |  |
| HDL-C (mmol/L) | 1.13 (0.23) | 1.11 (0.20) | 0.807 |  | 1.11 (0.29) | 1.10 (0.19) | 0.912 |  |
| LDL-C (mmol/L) | 3.08 (0.63) | 2.93 (0.50) | 0.309 |  | 3.16 (0.70) | 2.90 (0.55) | 0.224 |  |
| Free triiodothyronine (pmol/L) | 4.53 (0.48) | 4.47 (0.57) | 0.604 |  | 4.48 (0.51) | 4.43 (0.64) | 0.782 |  |
| Free tetraiodothyronine (pmol/L) | 12.86 [11.69, 13.84] | 13.06 [12.44, 13.44] | 0.843 |  | 13.34 [12.01, 13.71] | 12.71 [12.44, 13.30] | 0.647 |  |
| Thyroid stimulating hormone (μIU/mL) | 2.20 [1.66, 3.29] | 2.28 [1.85, 3.72] | 0.635 |  | 2.10 [1.56, 3.12] | 2.08 [1.82, 2.74] | 0.847 |  |
| WBC count (10^9/L) | 8.18 (1.88) | 7.84 (1.91) | 0.461 |  | 7.91 (1.28) | 7.32 (1.57) | 0.210 |  |
| Neutrophil percentage (%) | 57.79 (7.06) | 57.67 (8.91) | 0.949 |  | 58.63 (7.02) | 57.15 (9.18) | 0.574 |  |
| C-reactive protein (mg/L) | 5.02 [2.88, 7.00] | 6.44 [4.68, 8.55] | 0.096 |  | 5.31 [3.44, 6.89] | 7.01 [4.24, 9.03] | 0.152 |  |

Continuous variables with normal distribution are presented as mean (standard deviation), while other continuous variables are presented as median [interquartile range]. Categorical variables are presented as n (%).

Continuous variables with normal distribution are presented as mean (standard deviation), while other continuous variables are presented as median [interquartile range]. Categorical variables are presented as n (%).

SMD: standardized mean difference; SD: standard deviation; BMI: body mass index; HbA1c: glycosylated hemoglobin; HOMA-IR: Homeostasis Model Assessment of Insulin Resistance; HOMA-β: Homeostasis Model Assessment of β-cell Function; ISI (0,120): insulin sensitivity index derived from 0- and 120-min OGTT values; DI: disposition indices; HDL-C: high-density lipoprotein cholesterol; LDL-C: low-density lipoprotein cholesterol; WBC: white blood cell

|  |  | Weight regain | Weight sustain | p |
| --- | --- | --- | --- | --- |
| NFS | n | 132 | 51 |  |
| NFS<-1.45 | 101 (76.5%) | 37 (72.5%) | 0.576 |
| NFS≥-1.45 | 31 (23.5%) | 14 (27.5%) |
| FIB-4 | n | 136 | 51 |  |
| FIB-4<1.3 | 130 (95.6%) | 49 (96.1%) | 0.883 |
| FIB-4≥1.3 | 6 (4.4%) | 2 (3.9%) |

**Supplementary Table 5. Non-invasive scoring systems (NFS, FIB-4) evaluating MAFLD in different groups.**

|  |  | Weight regain | Weight sustain | p |
| --- | --- | --- | --- | --- |
| NFS | n | 41 | 46 |  |
| NFS<-1.45 | 30 (73.2%) | 34 (73.9%) | 0.938 |
| NFS≥-1.45 | 11 (26.8%) | 12 (26.1%) |
| FIB-4 | n | 43 | 46 |  |
| FIB-4<1.3 | 40 (93.0%) | 45 (97.8%) | 0.275 |
| FIB-4≥1.3 | 3 (7.0%) | 1 (2.2%) |

**Supplementary Table 6. Non-invasive scoring systems (NFS, FIB-4) evaluating MAFLD after PSM in all patients.**

|  |  | Weight regain | Weight sustain | p |
| --- | --- | --- | --- | --- |
| NFS | n | 57 | 31 |  |
| NFS<-1.45 | 42 (73.7%) | 22 (71.0%) | 0.785 |
| NFS≥-1.45 | 15 (26.3%) | 9 (29.0%) |
| FIB-4 | n | 59 | 31 |  |
| FIB-4<1.3 | 54 (91.5%) | 29 (93.5%) | 0.734 |
| FIB-4≥1.3 | 5 (8.5%) | 2 (6.5%) |

**Supplementary Table 7. Non-invasive scoring systems (NFS, FIB-4) evaluating MAFLD in male patients.**

|  |  | Weight regain | Weight sustain | p |
| --- | --- | --- | --- | --- |
| NFS | n | 23 | 27 |  |
| NFS<-1.45 | 16 (69.6%) | 19 (70.4%) | 0.785 |
| NFS≥-1.45 | 7 (30.4%) | 8 (29.6%) |
| FIB-4 | n | 24 | 27 |  |
| FIB-4<1.3 | 20 (83.3%) | 25 (92.6%) | 0.734 |
| FIB-4≥1.3 | 4 (16.7%) | 2 (7.4%) |

**Supplementary Table 8. Non-invasive scoring systems (NFS, FIB-4) evaluating MAFLD in male patients after matching.**

**Supplementary Table 9. Clinical features of weight regain and sustain group of female patients in sensitivity analysis**

|  | **Raw data** | | |  | **Propensity score-matched data** | | | |
| --- | --- | --- | --- | --- | --- | --- | --- | --- |
| Female | Weight regain | Weight sustain | p |  | Weight regain | Weight sustain | p | SMD |
| n | 58 | 21 |  |  | 30 | 15 |  |  |
| Age (years) | 27.59 (5.19) | 30.38 (7.45) | 0.065 |  | 27.13 (4.33) | 26.80 (5.23) | 0.821 | 0.069 |
| Weight (kg) | 96.44 (12.73) | 96.46 (14.90) | 0.994 |  | 95.94 (14.41) | 97.33 (14.34) | 0.761 | 0.097 |
| BMI (kg/m^2) | 36.04 (4.72) | 35.84 (4.90) | 0.869 |  | 35.98 (5.57) | 36.19 (4.77) | 0.904 | 0.039 |
| ALT (IU/L) | 28.00 [18.25, 58.75] | 35.00 [21.00, 59.00] | 0.590 |  | 28.00 [19.25, 52.50] | 33.00 [20.00, 45.50] | 0.885 |  |
| AST (IU/L) | 23.50 [18.00, 35.75] | 24.00 [21.00, 36.00] | 0.348 |  | 22.50 [18.00, 33.00] | 24.00 [19.00, 30.50] | 0.819 |  |
| GGT (IU/L) | 26.00 [18.00, 33.00] | 23.00 [17.00, 64.00] | 0.524 |  | 27.00 [18.00, 32.00] | 23.00 [17.50, 51.50] | 0.892 |  |
| AKP (IU/L) | 71.10 (20.55) | 75.48 (18.44) | 0.394 |  | 69.57 (18.17) | 73.13 (17.19) | 0.531 |  |

Continuous variables with normal distribution are presented as mean (standard deviation), while other continuous variables are presented as median [interquartile range]. Categorical variables are presented as n (%).

SMD: standardized mean difference; SD: standard deviation; BMI: body mass index; ALT: alanine aminotransferase; AST: aspartate aminotransferase; GGT: γ-glutamyl transpeptidase; AKP: alkaline phosphatase

| Patient ID | Group | Sex | Age | BMI (kg/m2) | Steatosis | Lobular inflammation | Hepatocellular ballooning | NAS total score | Fibrosis stage |
| --- | --- | --- | --- | --- | --- | --- | --- | --- | --- |
| 1 | Weight regain | Male | 35 | 38.77 | 2 | 1 | 0 | 3 | 0 |
| 2 | Weight regain | Male | 32 | 48.03 | 1 | 1 | 0 | 2 | 0 |
| 3 | Weight regain | Male | 29 | 38.56 | 3 | 1 | 0 | 4 | 0 |
| 4 | Weight regain | Male | 28 | 41.97 | 2 | 0 | 0 | 2 | 0 |
| 5 | Weight regain | Male | 29 | 49.27 | 2 | 1 | 0 | 3 | 0 |
| 6 | Weight sustain | Male | 37 | 43.77 | 1 | 1 | 1 | 3 | 0 |
| 7 | Weight sustain | Male | 40 | 42.77 | 2 | 1 | 0 | 3 | 0 |
| 8 | Weight sustain | Male | 37 | 39.07 | 1 | 0 | 0 | 1 | 0 |
| 9 | Weight sustain | Male | 30 | 46.71 | 2 | 1 | 1 | 4 | 1 |
| 10 | Weight sustain | Male | 31 | 45.13 | 1 | 1 | 0 | 2 | 0 |
| 11 | Weight regain | Female | 32 | 39.86 | 1 | 1 | 1 | 3 | 0 |
| 12 | Weight regain | Female | 27 | 47.98 | 2 | 0 | 1 | 3 | 1 |
| 13 | Weight regain | Female | 37 | 41.03 | 1 | 1 | 0 | 2 | 0 |
| 14 | Weight sustain | Female | 31 | 40.23 | 3 | 0 | 0 | 3 | 0 |
| 15 | Weight sustain | Female | 32 | 47.75 | 2 | 1 | 0 | 3 | 1 |
| 16 | Weight sustain | Female | 29 | 42.86 | Sample missing | | | | |

**Supplementary Table 10. Descriptive data and histologic profile (NAS) of patients with biopsy samples.**
